# Supplementary material for: The impact of NO x addition on the ignition behaviour of n -pentane
Source: Royal Society of Chemistry journal article supplement (doi:10.1039/d1re00055a), 2021-01-01
Supplement: d1re00055a1.pdf [file d1re00055a1.pdf]

# The impact of NO<sub>x</sub> addition on the ignition behavior of *n*-pentane Supplemental Material - Comparison of Final and Intermediate Mechanisms

Mark E. Fuller<sup>\*a‡</sup>, Philipp Morsch<sup>a</sup>, Matthias Preußker<sup>a</sup>, C. Franklin Goldsmith<sup>b</sup>, and K. Alexander Heufer<sup>a</sup>

Additional notes on supplemental materials:

- The preprint of this manuscript, including supplemental materials, is available at <https://doi.org/10.26434/chemrxiv.13720105>
- The v.0 mechanism has been deposited into an open database at <https://github.com/jiweiqi/CollectionOfMechanism/tree/master/Nitrogen/Fuller-2021>
- The experimental data files have been deposited into an open database at <https://github.com/pr-omethe-us/ChemKED-database>

## References

- 1 M. P. Rissanen, S. L. Arppe, A. J. Eskola, M. M. Tammi and R. S. Timonen, *The Journal of Physical Chemistry A*, 2010, **114**, 4811–4817.
- 2 R. Atkinson, D. L. Baulch, R. A. Cox, J. N. Crowley, R. F. Hampson, R. G. Hynes, M. E. Jenkin, M. J. Rossi, J. Troe and I. Subcommittee, *Atmospheric Chemistry and Physics*, 2006, **6**, 3625–4055.
- 3 L. Marrodán, Y. Song, M. L. Lavadera, O. Herbinet, M. de Joannon, Y. Ju, M. U. Alzueta and F. Battin-Leclerc, *Energy & Fuels*, 2019, **33**, 5655–5663.

<sup>a</sup> Physico-Chemical Fundamentals of Combustion, RWTH Aachen University, 52062 Aachen Germany; E-mail: fuller@pcf.rwth-aachen.de

<sup>b</sup> School of Engineering, Brown University, Providence, RI 02912, USA

‡ Present address: Faculty of Chemical Engineering, Technion I.I.T., Haifa 3200003, Israel

| Class                                                                   | Source | v.0  | v.8  | v.11 | v.12 |
|-------------------------------------------------------------------------|--------|------|------|------|------|
| $R + NO_x \rightleftharpoons \text{Alkene} + \{\text{HNO/HONO/HNO}_2\}$ | RMG    | 0.01 | 0.01 | 1.00 | 0.10 |
| $R + NO_2 \rightleftharpoons \text{RONO}$                               | RMG    | 0.10 | 1.00 | 1.00 | 1.00 |
| $RO + NO_x \rightleftharpoons \text{ROONO}_x$                           | RMG    | 1e-3 | 1.00 | 1.00 | 1.00 |
| $R + NO_2 \rightleftharpoons RO + NO$                                   | Ref. 1 | 0.10 | 1.00 | 1.00 | 1.00 |
| $RO_2 + NO_2 \rightleftharpoons RO + NO_2$                              | Ref. 2 | 0.01 | 1.00 | 1.00 | 1.00 |
| $RNO_2 \rightleftharpoons R + NO_2$                                     | Ref. 3 | 2.00 | 1.00 | 1.00 | 1.00 |
| $O_2C_5H_{10}OOH + NO \rightleftharpoons OH + 2CH_2O + C_3H_6 + NO_2$   | Ref. 3 | 0.00 | 1.00 | 1.00 | 1.00 |

**Table S2-1** Adjustment factors for reaction classes by model iteration ID

Step-wise evaluation of the mechanism from initial construction through the result presented herein is detailed in table S2-1 and figure S2-1.

In order to reassess the mechanism development in light of the absence of reliable NO-doped experiments, numerous iterations have been performed in which the factors by which rates were adjusted have been "rolled-back" to unity in order to observe the effect on the model predictions. The class of rates obtained from RMG for which values were reduced by a factor of 100 ( $R + NO_x \rightleftharpoons \text{Alkene} + \{\text{HNO/HONO/HNO}_2\}$ , referred ) is confirmed to be a particularly sensitive class of reactions. Reanalysis, however, suggests that while decreasing the rates by a factor of ten makes a significant improvement in model predictions, reduction by a factor of one-hundred offers essentially no further gains for the IDT predictions of  $NO_2$  experiments, *ceteris parabis*.

However, if one then proceeds to view the predictions for the available JSR data, where we are confident about NO, figures S2-2 and S2-3 with same color scheme as figure S2-1, the totality of changes incorporated in the v.0 (final, submitted) model offer a superior fit to the data as compared with the "rolled-back" mechanisms and one which is competitive on fit with the mechanism published in Marrodán *et al.*.

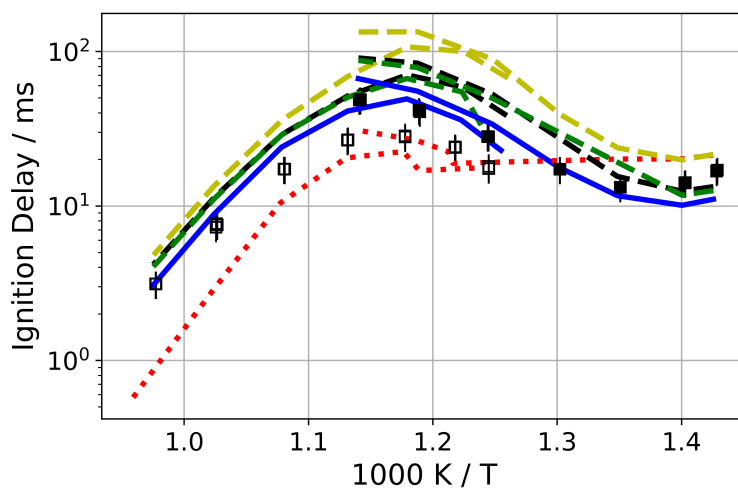

(a)  $\phi = 1.0$ ; 333 ppm  $\text{NO}_2$

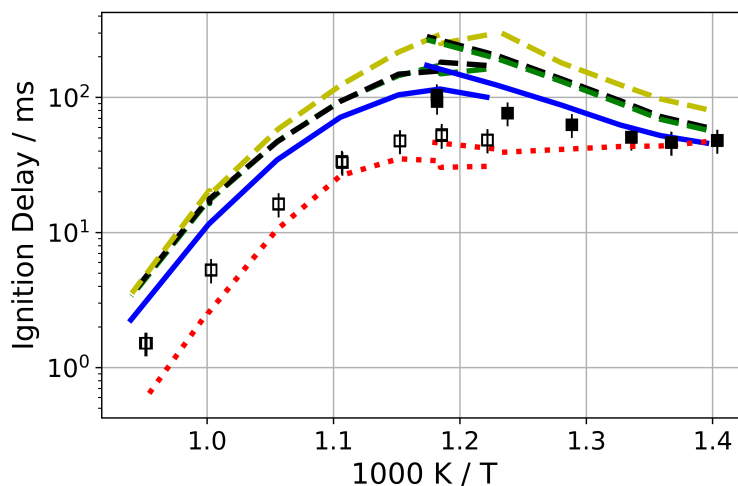

(b)  $\phi = 0.5$ ; 333 ppm  $\text{NO}_2$

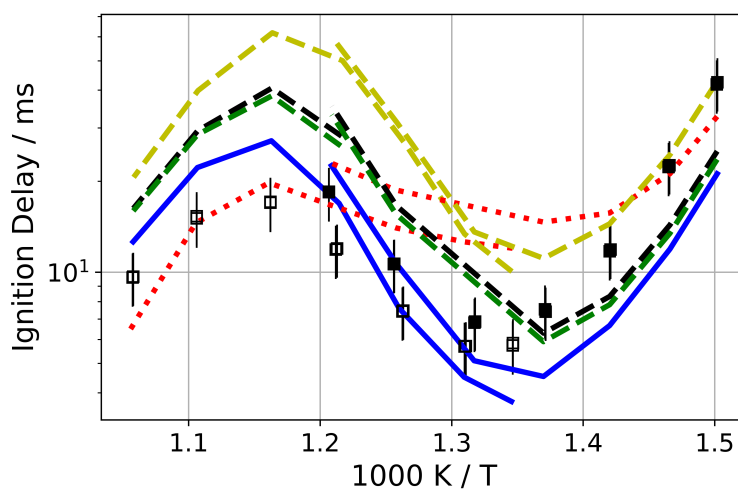

(c)  $\phi = 2.0$ ; 333 ppm  $\text{NO}_2$

**Fig. S2-1** 333ppm  $\text{NO}_2$ -doped experiments with models: present work (solid blue, v.0), Marrodán *et al.* (solid red); present work with all rates reset (dashed yellow, v.11), effect of only reducing  $\text{R} + \text{NO}_x \rightleftharpoons \text{Alkene} + \{\text{HNO}/\text{HONO}/\text{HNO}_2\}$  by 10x (dashed black, v.12), effect of only reducing  $\text{R} + \text{NO}_x \rightleftharpoons \text{Alkene} + \{\text{HNO}/\text{HONO}/\text{HNO}_2\}$  by 100x (dashed green, v.8).

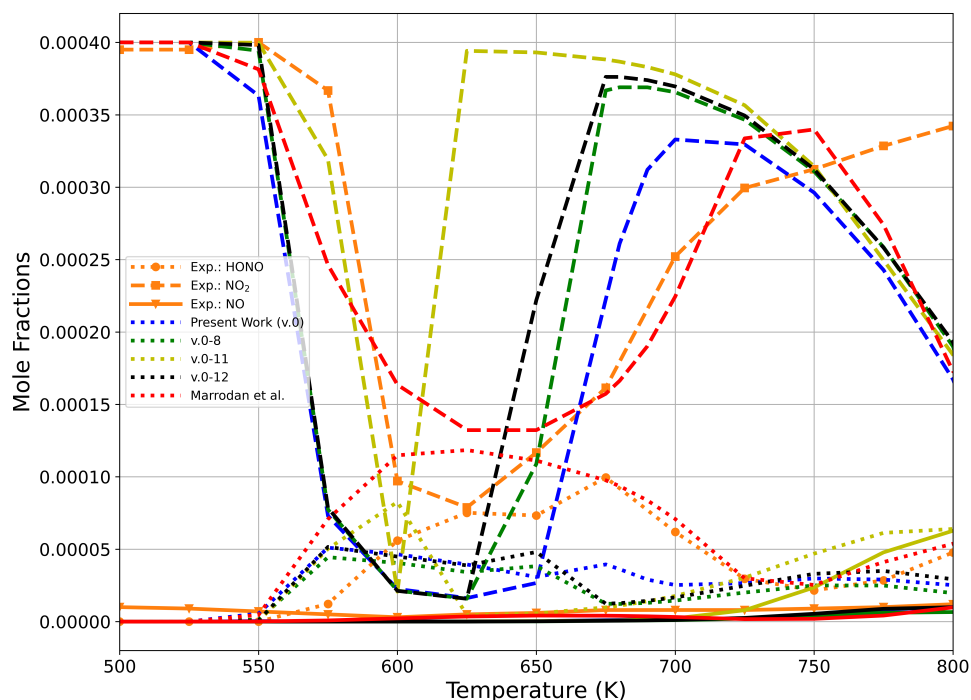

**Fig. S2-2** Comparison of mechanisms for pentane oxidation with 400 ppm  $\text{NO}_2$  in JSR: experimental measurements (orange) of HONO +  $\text{HNO}_2$  (—●),  $\text{NO}_2$  (---■),  $\text{HNO}_2$  (·····▼); present work (solid blue, v.0), Marrodán *{et al.}* (solid red); present work with all rates reset (dashed yellow, v.11), effect of only reducing  $\text{R} + \text{NO}_x \rightleftharpoons \text{Alkene} + \{\text{HNO}/\text{HONO}/\text{HNO}_2\}$  by 10x (dashed black, v.12), effect of only reducing  $\text{R} + \text{NO}_x \rightleftharpoons \text{Alkene} + \{\text{HNO}/\text{HONO}/\text{HNO}_2\}$  by 100x (dashed green, v.8).

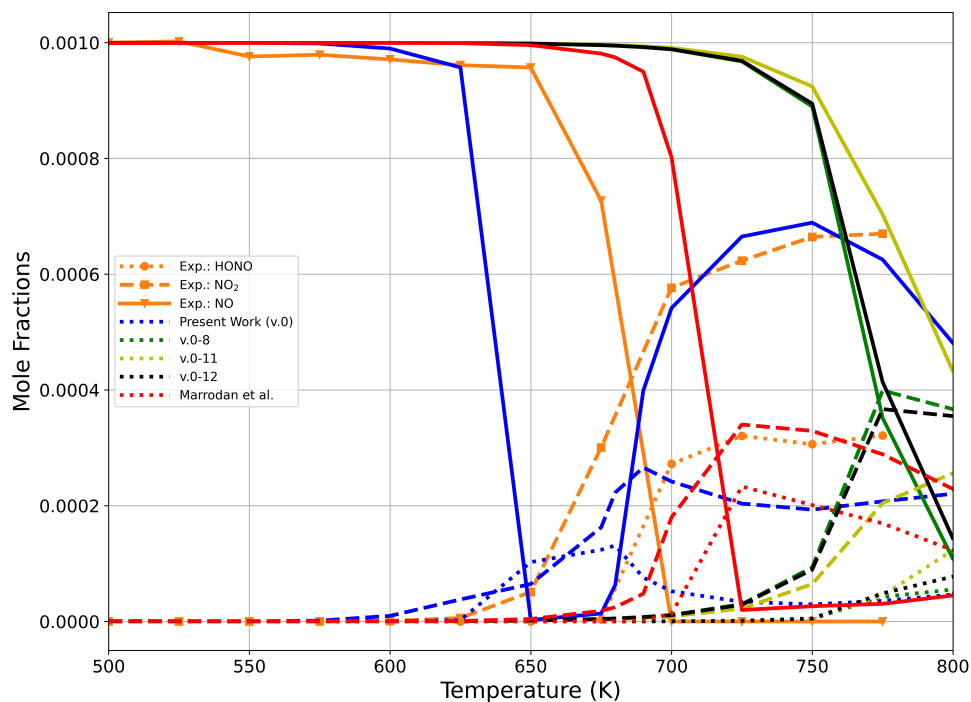

**Fig. S2-3** Comparison of mechanisms for pentane oxidation with 1000 ppm  $\text{NO}$  in JSR: experimental measurements (orange) of HONO +  $\text{HNO}_2$  (—●),  $\text{NO}_2$  (---■),  $\text{HNO}_2$  (·····▼); present work (solid blue, v.0), Marrodán *{et al.}* (solid red); present work with all rates reset (dashed yellow, v.11), effect of only reducing  $\text{R} + \text{NO}_x \rightleftharpoons \text{Alkene} + \{\text{HNO}/\text{HONO}/\text{HNO}_2\}$  by 10x (dashed black, v.12), effect of only reducing  $\text{R} + \text{NO}_x \rightleftharpoons \text{Alkene} + \{\text{HNO}/\text{HONO}/\text{HNO}_2\}$  by 100x (dashed green, v.8).
