# Supplementary material for: The impact of NO x addition on the ignition behaviour of n -pentane
Source: Royal Society of Chemistry journal article supplement (doi:10.1039/d1re00055a), 2021-01-01
Supplement: d1re00055a2.pdf [file d1re00055a2.pdf]

# The impact of NO<sub>x</sub> addition on the ignition behavior of *n*-pentane Supplemental Material - Additional Figures and Tables

Mark E. Fuller<sup>\*a‡</sup>, Philipp Morsch<sup>a</sup>, Matthias Preußker<sup>a</sup>, C. Franklin Goldsmith<sup>b</sup>, and K. Alexander Heufer<sup>a</sup>

Additional notes on supplemental materials:

- The preprint of this manuscript, including supplemental materials, is available at <https://doi.org/10.26434/chemrxiv.13720105>
- The v.0 mechanism has been deposited into an open database at <https://github.com/jiweiqi/CollectionOfMechanisms/tree/master/Nitrogen/Fuller-2021>
- The experimental data files have been deposited into an open database at <https://github.com/pr-omethe-us/ChemKED-database>

## References

- 1 J. Bugler, B. Marks, O. Mathieu, R. Archuleta, A. Camou, C. Grégoire, K. A. Heufer, E. L. Petersen and H. J. Curran, *Combustion and Flame*, 2016, **163**, 138–156.
- 2 P. Glarborg, J. A. Miller, B. Ruscic and S. J. Klippenstein, *Progress in Energy and Combustion Science*, 2018, **67**, 31–68.
- 3 L. Marrodán, Y. Song, M. L. Lavadera, O. Herbinet, M. de Joannon, Y. Ju, M. U. Alzueta and F. Battin-Leclerc, *Energy & Fuels*, 2019, **33**, 5655–5663.

<sup>a</sup> Physico-Chemical Fundamentals of Combustion, RWTH Aachen University, 52062 Aachen Germany; E-mail: fuller@pcf.rwth-aachen.de

<sup>b</sup> School of Engineering, Brown University, Providence, RI 02912, USA

‡ Present address: Faculty of Chemical Engineering, Technion I.I.T., Haifa 3200003, Israel

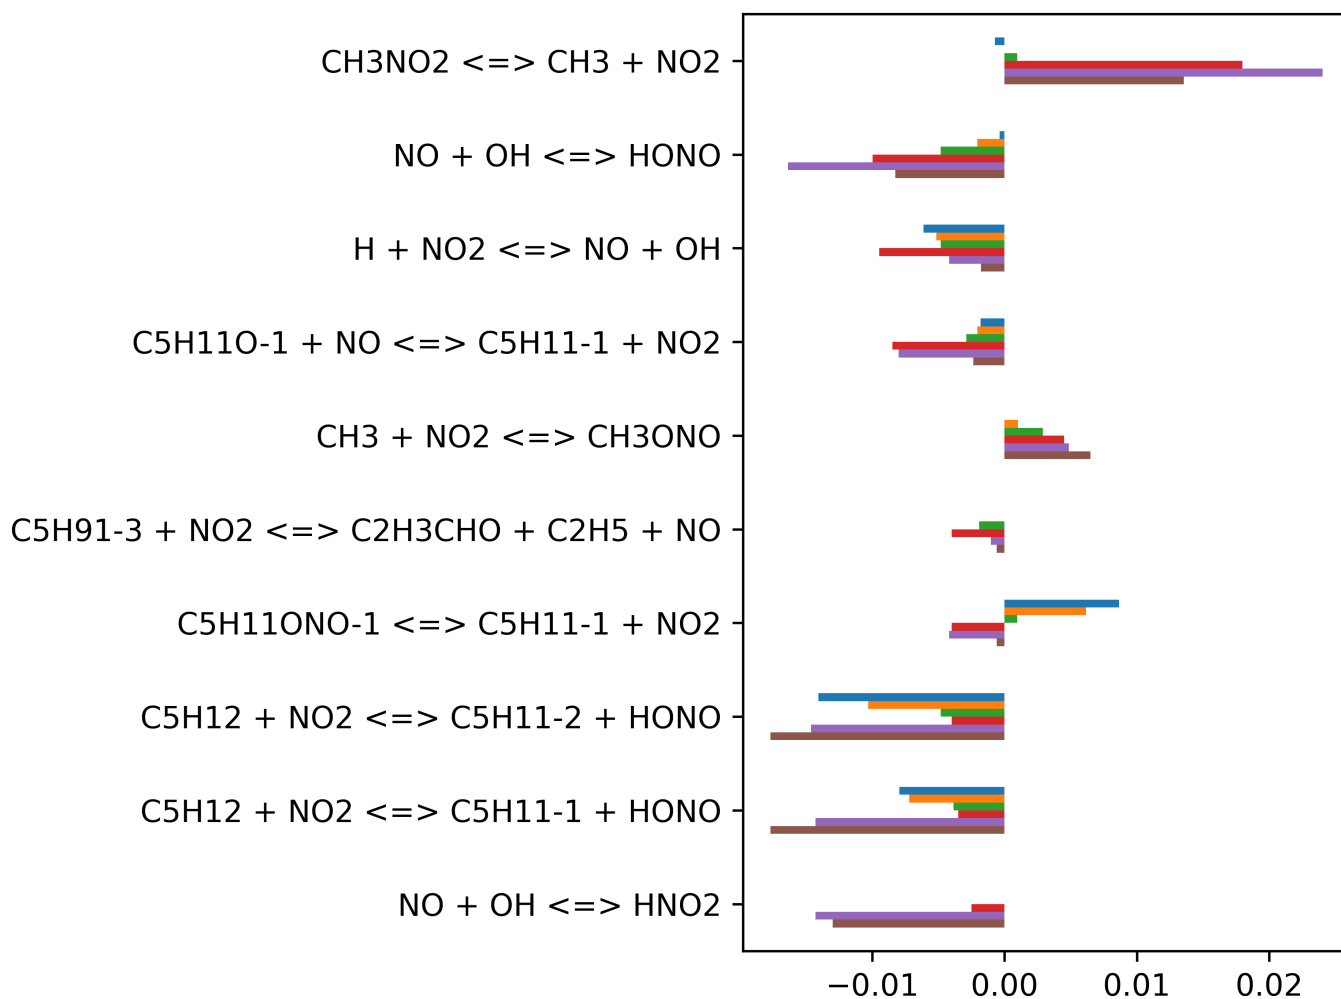

**Fig. S1** Sensitivities ( $\frac{\partial \ln \tau}{\partial \ln k}$ ) among reactions added to the mechanisms of Bugler *et al.*<sup>1</sup> and Glarborg *et al.*<sup>2</sup> for *n*-pentane in synthetic air diluted with N<sub>2</sub> at equivalence ratio of  $\phi = 1.0$  with 333 ppm NO<sub>2</sub>. Individual bands represent analysis at temperatures of 650 K (top, blue) to 900 K (bottom, brown) in 50 K increments.

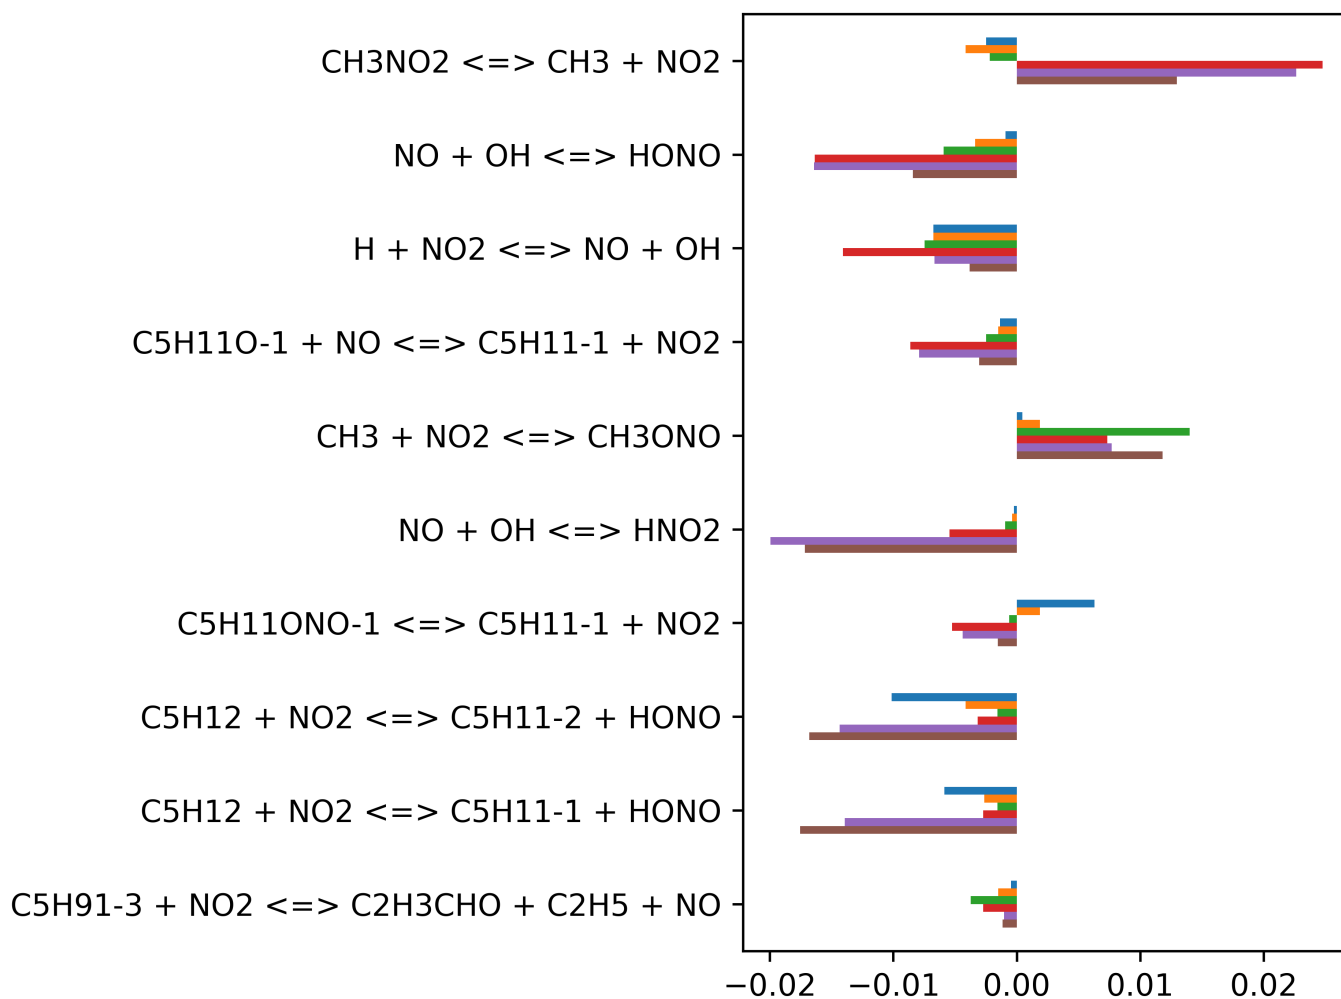

**Fig. S2** Sensitivities  $\left(\frac{\partial \ln \epsilon}{\partial \ln k}\right)$  among reactions added to the mechanisms of Bugler *et al.*<sup>1</sup> and Glarborg *et al.*<sup>2</sup> for *n*-pentane in synthetic air diluted with N<sub>2</sub> at equivalence ratios of  $\phi = 0.5$  with 333 ppm NO<sub>2</sub>. Individual bands represent analysis at temperatures of 650 K (top, blue) to 900 K (bottom, brown) in 50 K increments.

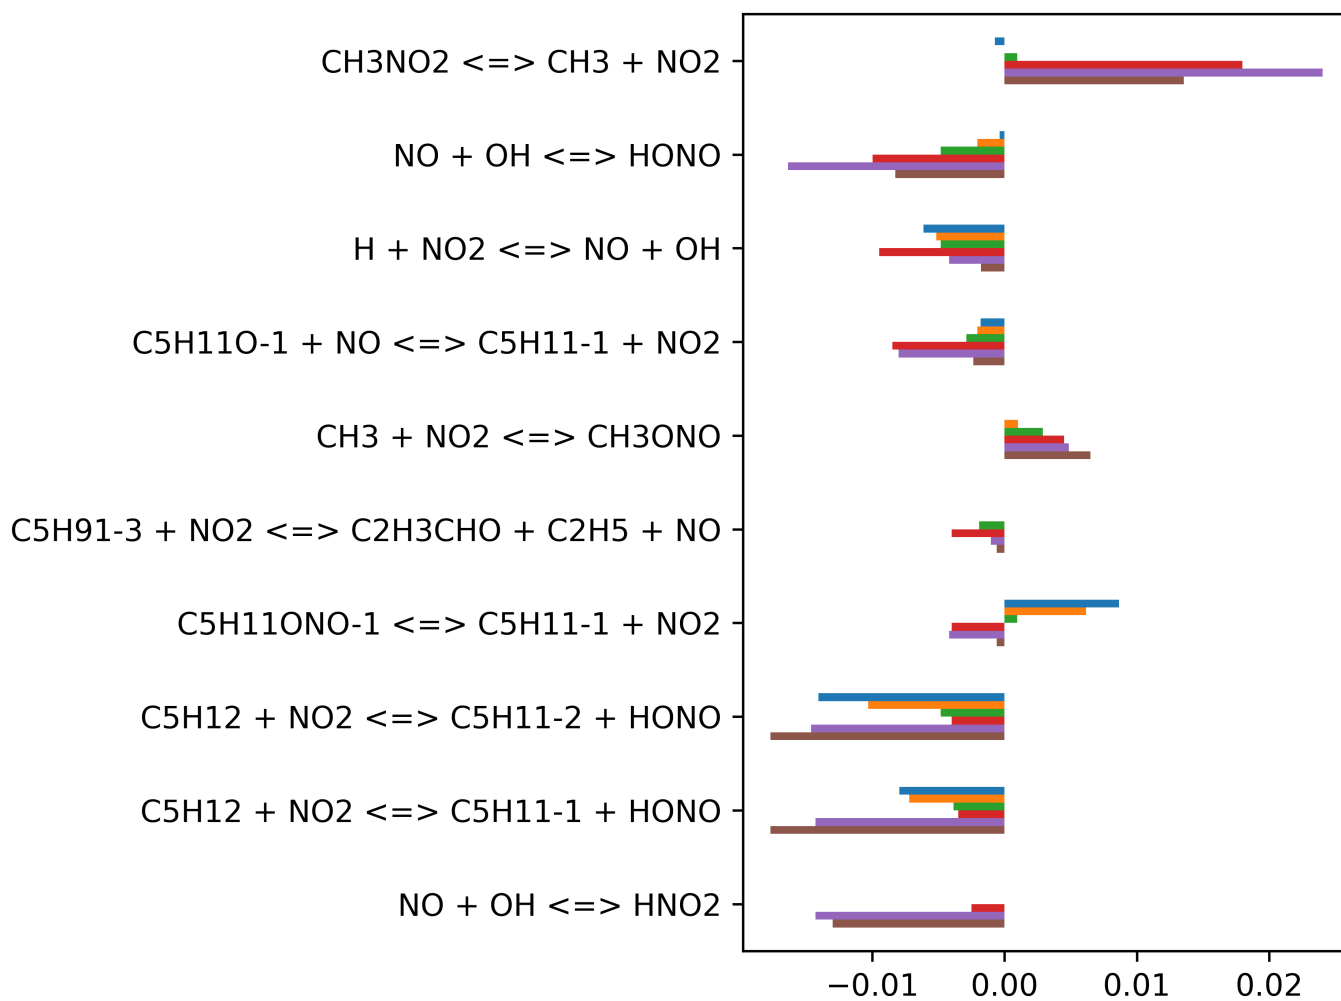

**Fig. S3** Sensitivities  $\left(\frac{\partial \ln \epsilon}{\partial \ln k}\right)$  among reactions added to the mechanisms of Bugler *et al.*<sup>1</sup> and Glarborg *et al.*<sup>2</sup> for *n*-pentane in synthetic air diluted with N<sub>2</sub> at equivalence ratios of  $\phi = 2.0$  with 333 ppm NO<sub>2</sub>. Individual bands represent analysis at temperatures of 650 K (top, blue) to 900 K (bottom, brown) in 50 K increments.

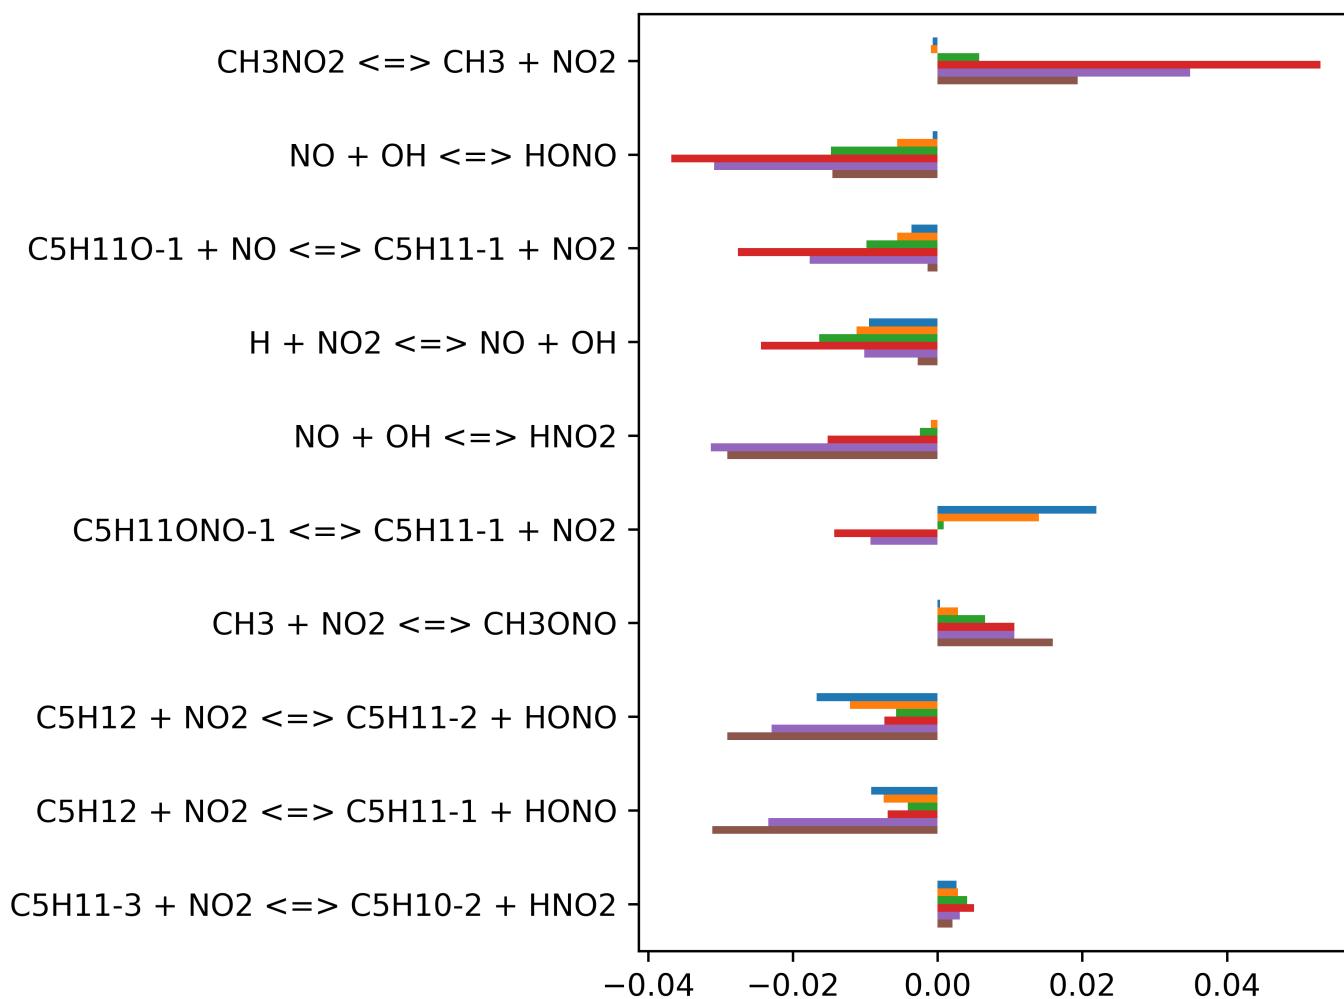

**Fig. S4** Sensitivities ( $\frac{\partial \ln \tau}{\partial \ln k}$ ) among reactions added to the mechanisms of Bugler *et al.*<sup>1</sup> and Glarborg *et al.*<sup>2</sup> for *n*-pentane in synthetic air diluted with N<sub>2</sub> at equivalence ratios of  $\phi = 1.0$  with 1000 ppm NO<sub>2</sub>. Individual bands represent analysis at temperatures of 650 K (top, blue) to 900 K (bottom, brown) in 50 K increments.

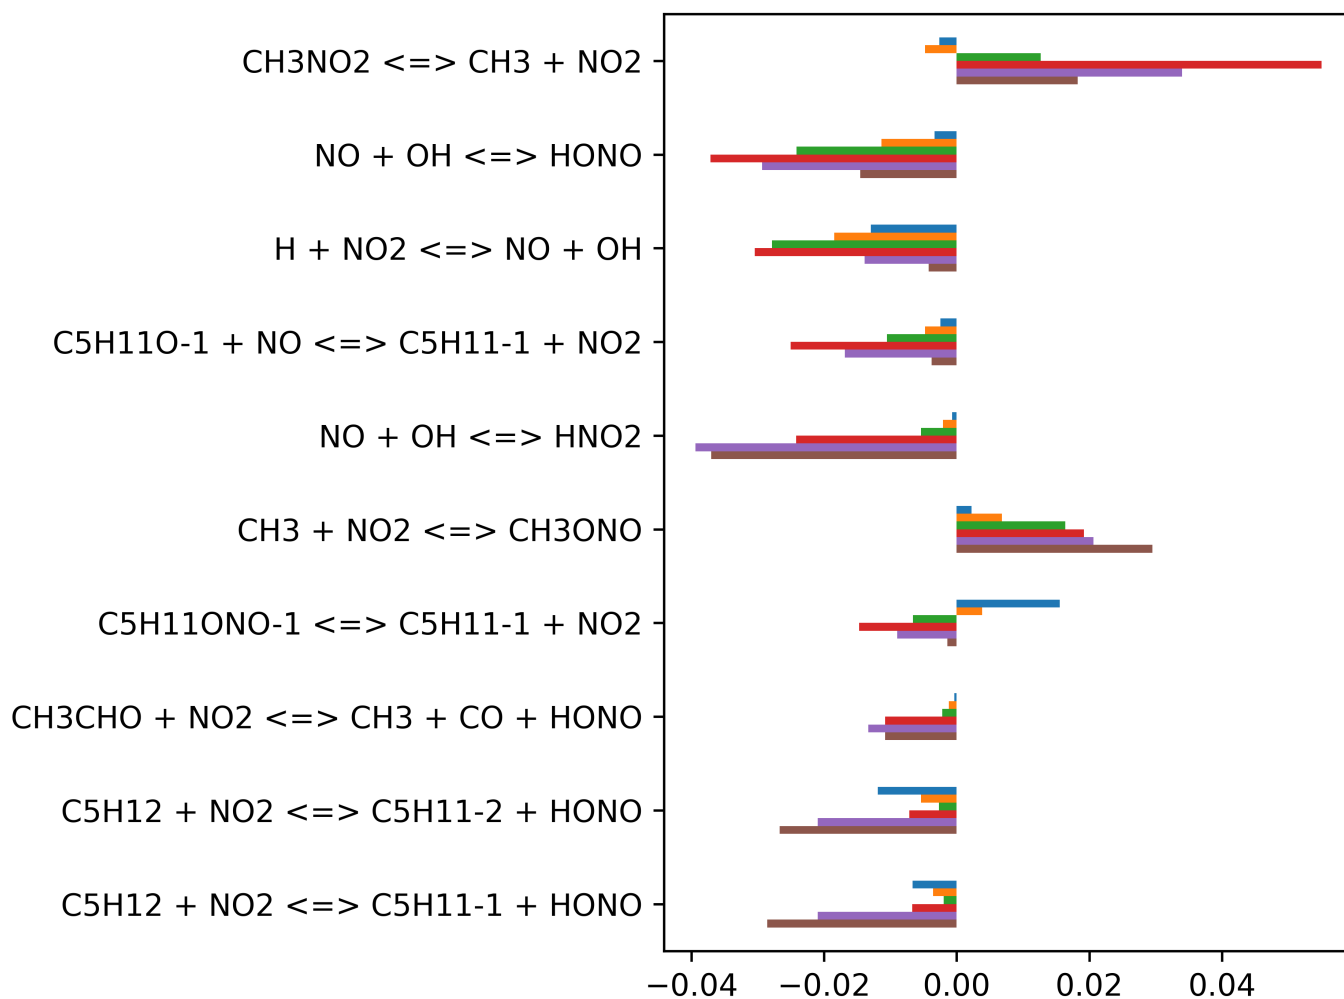

**Fig. S5** Sensitivities ( $\frac{\partial \ln \tau}{\partial \ln k}$ ) among reactions added to the mechanisms of Bugler *et al.*<sup>1</sup> and Glarborg *et al.*<sup>2</sup> for *n*-pentane in synthetic air diluted with N<sub>2</sub> at equivalence ratios of  $\phi = 0.5$  with 1000 ppm NO<sub>2</sub>. Individual bands represent analysis at temperatures of 650 K (top, blue) to 900 K (bottom, brown) in 50 K increments.

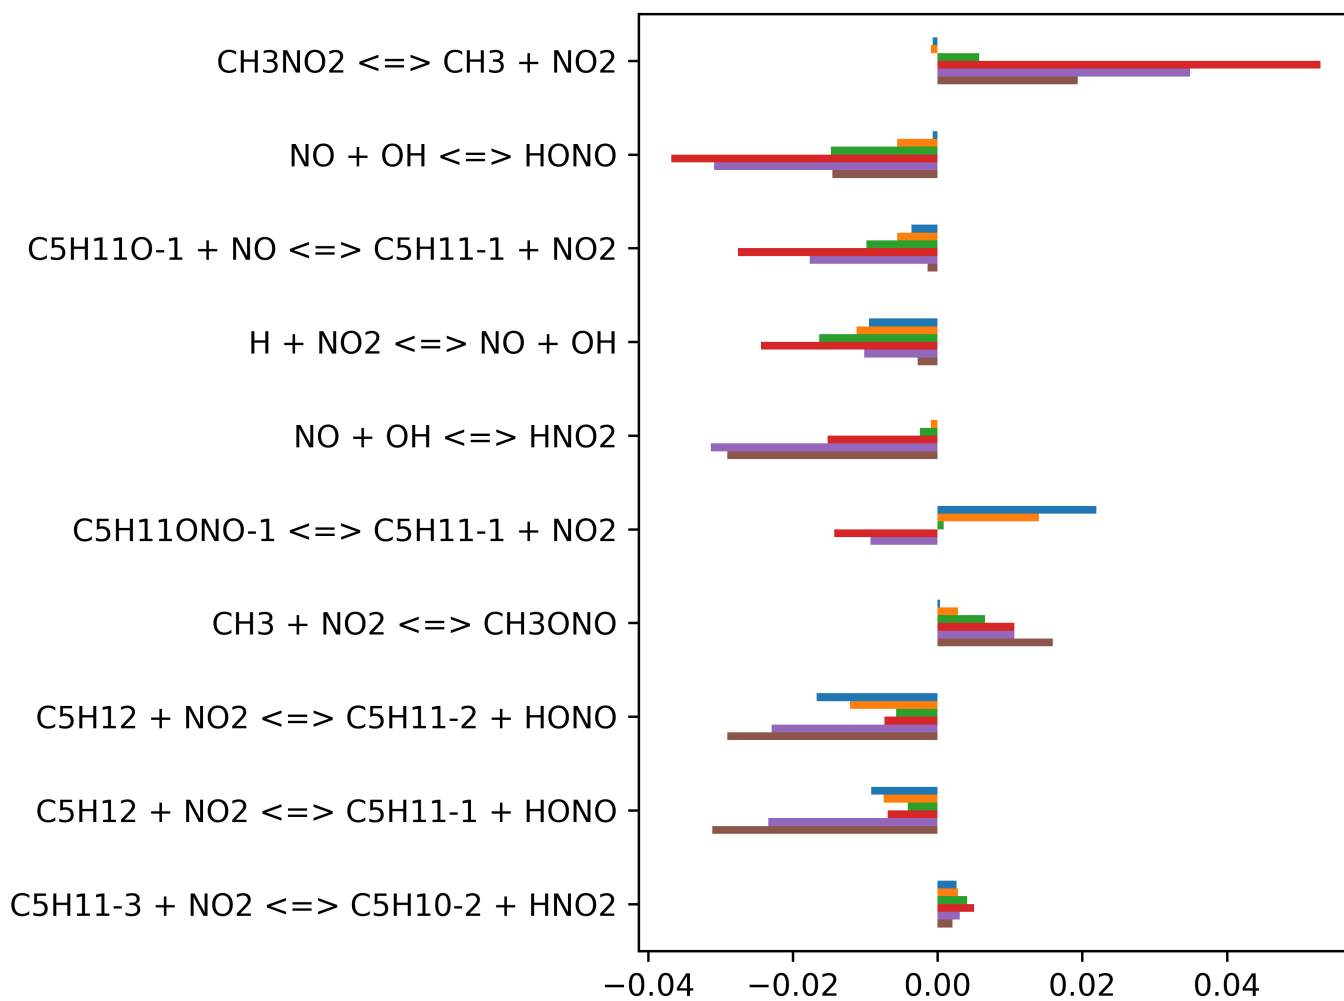

**Fig. S6** Sensitivities  $\left(\frac{\partial \ln \tau}{\partial \ln k}\right)$  among reactions added to the mechanisms of Bugler *et al.*<sup>1</sup> and Glarborg *et al.*<sup>2</sup> for *n*-pentane in synthetic air diluted with N<sub>2</sub> at equivalence ratios of  $\phi = 2.0$  with 1000 ppm NO<sub>2</sub>. Individual bands represent analysis at temperatures of 650 K (top, blue) to 900 K (bottom, brown) in 50 K increments.

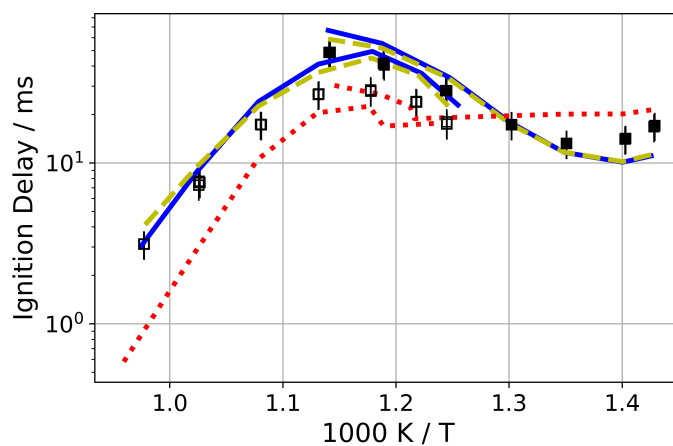

(a)  $\phi = 1.0$ ; 333 ppm  $\text{NO}_2$

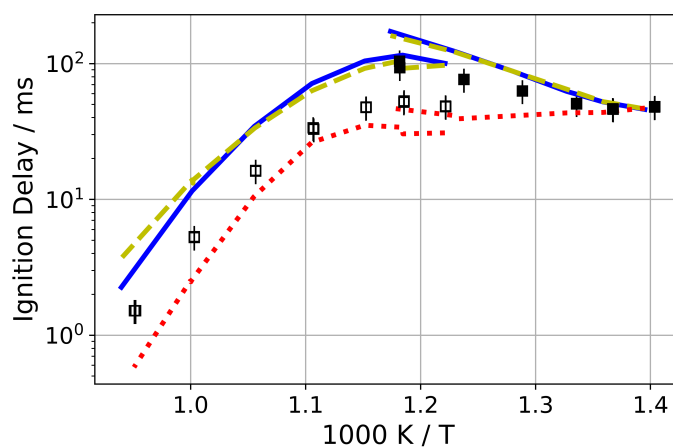

(b)  $\phi = 0.5$ ; 333 ppm  $\text{NO}_2$

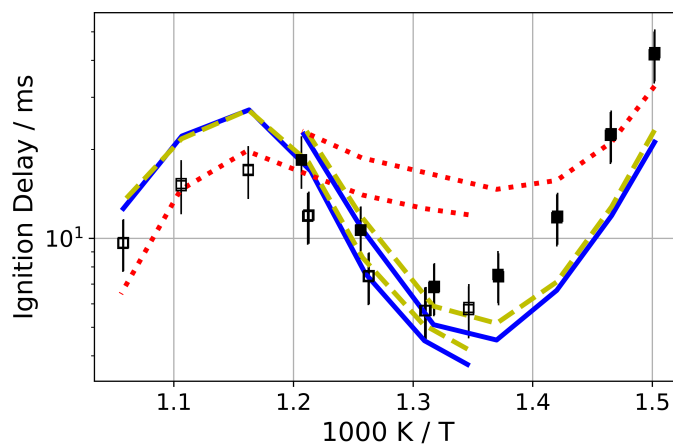

(c)  $\phi = 2.0$ ; 333 ppm  $\text{NO}_2$

**Fig. S7** Model predictions for *n*-pentane in synthetic air diluted with  $\text{N}_2$  or Ar at equivalence ratios of  $\phi = 1.0, 0.5, 2.0$  and with 333 ppm  $\text{NO}_2$ . Closed symbols are experiments conducted with  $\text{N}_2$  diluent; open symbols are Ar diluent. The solid blue line is the v.0 model presented in this work and the dashed yellow line is the v.1 optimized version with improved rate rules. The red dotted line is the model of Marrodán *et al.*<sup>3</sup>.



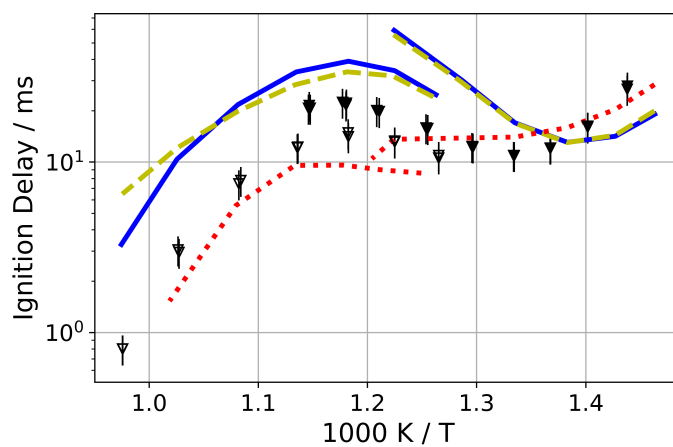

(a)  $\phi = 1.0$ ; 1000 ppm NO

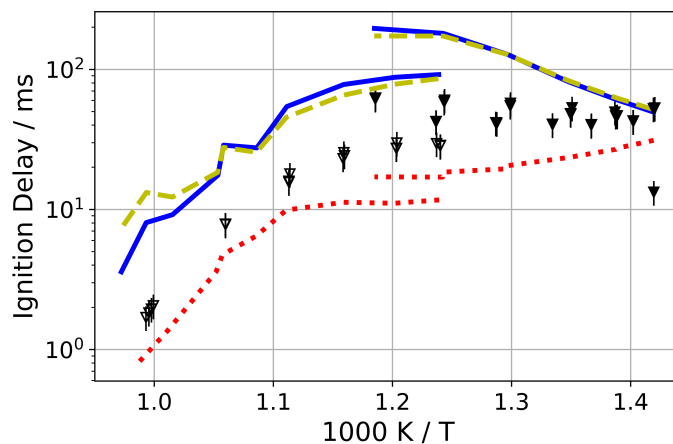

(b)  $\phi = 0.5$ ; 1000 ppm NO

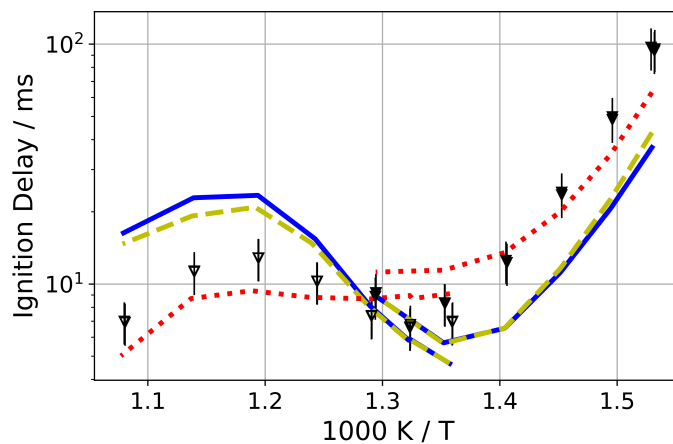

(c)  $\phi = 2.0$ ; 1000 ppm NO

**Fig. S8** Model predictions for *n*-pentane in synthetic air diluted with N<sub>2</sub> or Ar at equivalence ratios of  $\phi = 1.0, 0.5, 2.0$  and initially doped with 1000 ppm NO, fully reacted with O<sub>2</sub> to NO<sub>2</sub> by the start of the experiment. Closed symbols are experiments conducted with N<sub>2</sub> diluent; open symbols are Ar diluent. The solid blue line is the v.0 model presented in this work and the dashed yellow line is the v.1 optimized version with improved rate rules. The red dotted line is the model of Marrodán *et al.*<sup>3</sup>.

As a further effort to validate our assumption of complete conversion of NO to NO<sub>2</sub> in the mixing vessel through consumption of molecular oxygen, *i.e.*  $\text{NO} + 0.5\text{O}_2 \rightleftharpoons \text{NO}_2$ , a reference data set of IDT experiments containing 1000 ppm NO was compared with a second data set where NO was replaced by NO<sub>2</sub> and the O<sub>2</sub> concentration was reduced by 500 ppm, as depicted in figure S10.

The observed ignition delay times of these two mixtures are clearly within their experimental uncertainty, which justifies the assumption of a complete conversion of NO into NO<sub>2</sub> and therefore similar measured IDTs. N. B. The new experiments were performed in a second RCM which is of the same design as the primary instrument used in this work, but with slightly different compression characteristics leading to marginally shorter measured ignition delay times. Accordingly, we have added discussion of this phenomena in the manuscript and both re-analyzed and re-categorized the NO-doped experiments as if the dopant were NO<sub>2</sub>. We believe that the analysis and explanation added to the manuscript makes both the experimental conditions and analytical approach clear to the reader.

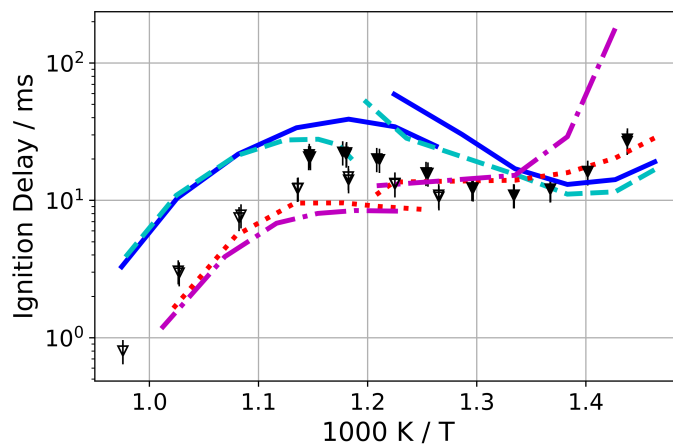

(a)  $\phi = 1.0$ ; 1000 ppm NO

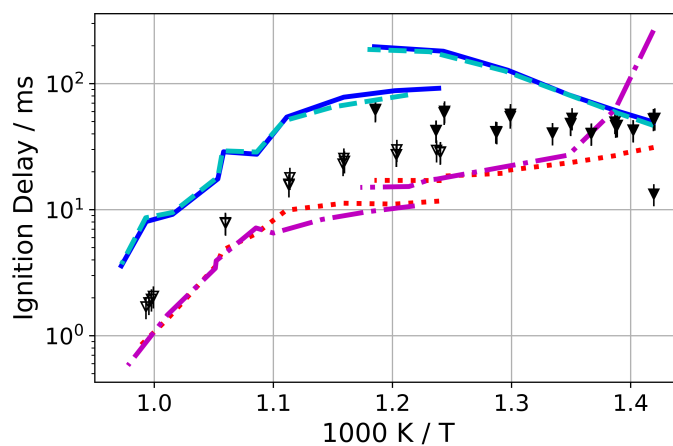

(b)  $\phi = 0.5$ ; 1000 ppm NO

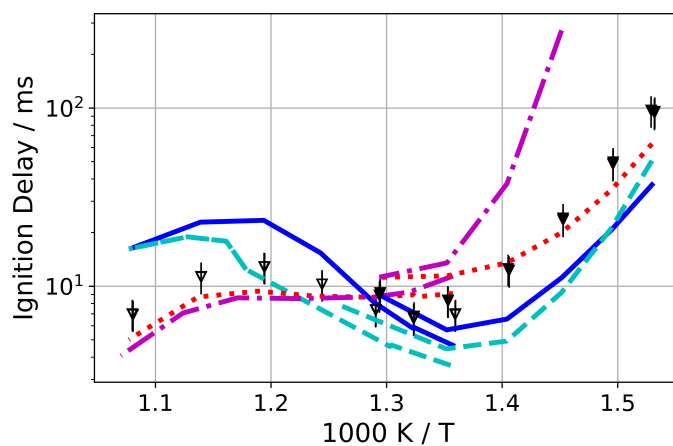

(c)  $\phi = 2.0$ ; 1000 ppm NO

**Fig. S9** Model predictions for *n*-pentane in synthetic air diluted with N<sub>2</sub> or Ar at equivalence ratios of  $\phi = 1.0, 0.5, 2.0$  and initially doped with 1000 ppm NO. Comparison of model predictions resulting from assuming complete conversion of NO to NO<sub>2</sub> via reaction with O<sub>2</sub> and ninety percent conversion prior to the start of the experiment. Closed symbols are experiments conducted with N<sub>2</sub> diluent; open symbols are Ar diluent. The solid blue and dashed cyan lines are the v.0 model presented in this work applied to full and ninety percent conversion of NO to NO<sub>2</sub>, respectively. The red dotted and magenta dash-dot lines are the model of Marrodán *et al.*<sup>3</sup> applied to full and ninety percent conversion of NO to NO<sub>2</sub>, respectively.

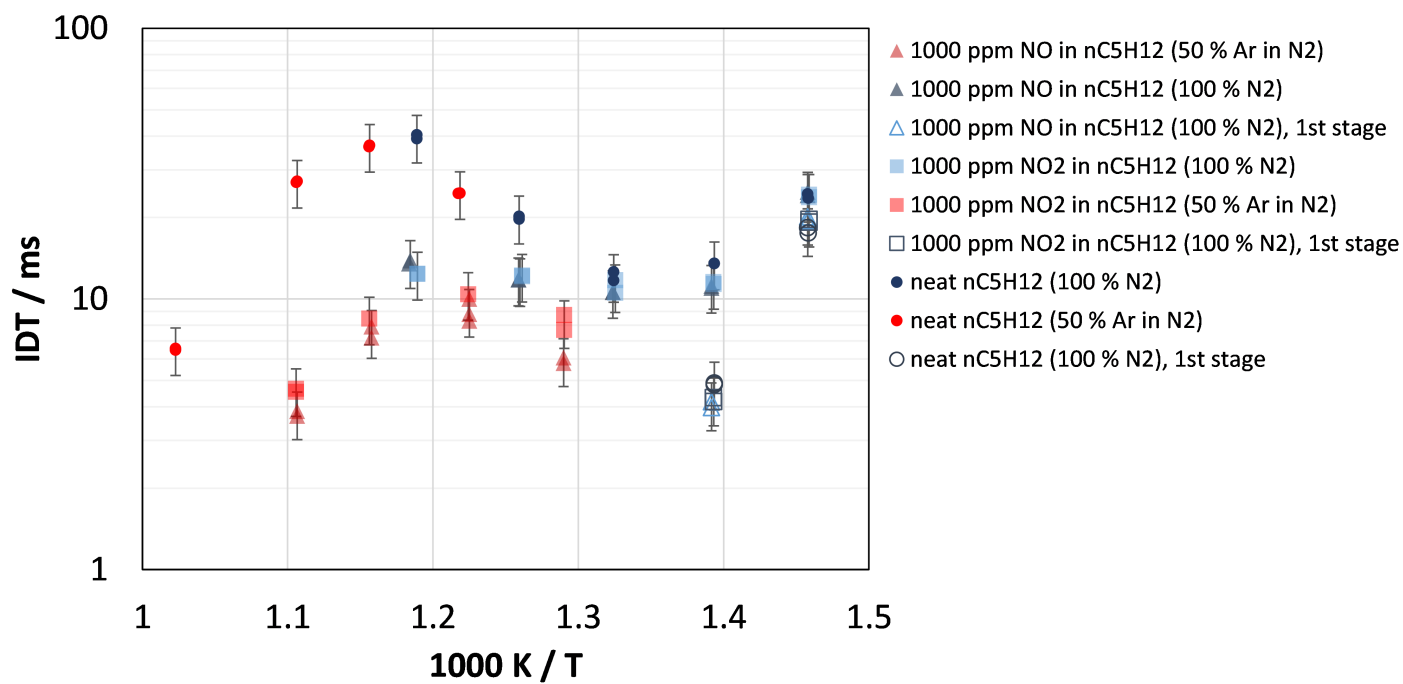

**Fig. S10** RCM Ignition Delay Time experiments for neat n-pentane (circles) and n-pentane doped with 1000 ppm NO (triangles) and 1000 ppm NO<sub>2</sub> (squares). pEOC = 15 bar, stoichiometric conditions,  $X_{DIL}/X_{O_2} = 8.524$ . Diluent: 100 vol.-% N<sub>2</sub> (blue symbols) and 50 vol.-% Ar/N<sub>2</sub> (red symbols). Open symbols illustrate the first stage of the corresponding experiments.)

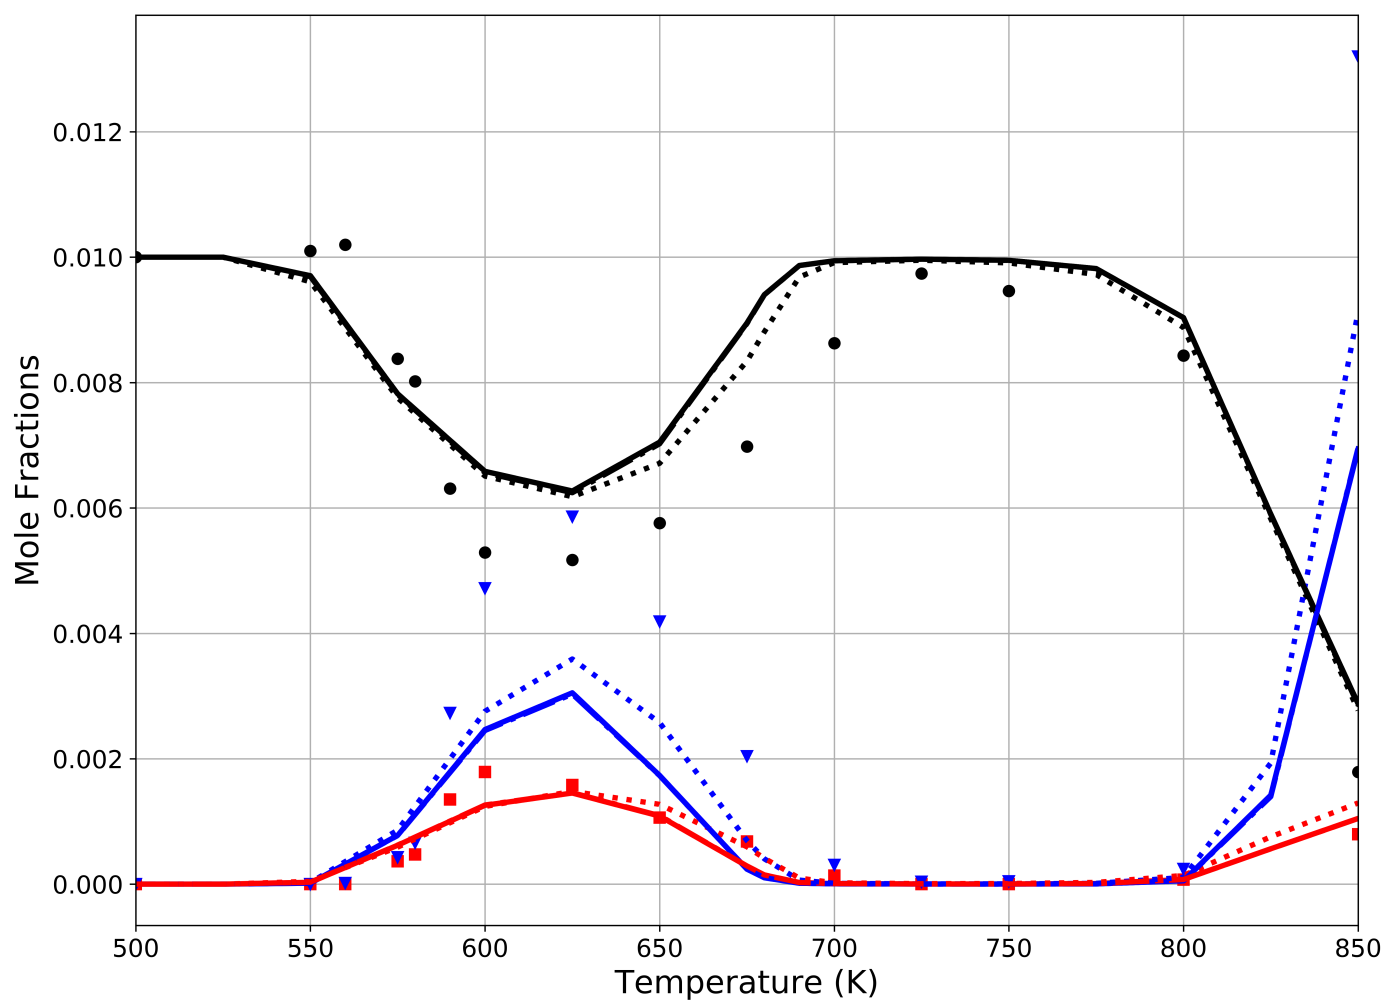

**Fig. S11** Comparison of mechanisms for neat pentane oxidation in JSR: Experimental measurements: black circles are  $n\text{-C}_5\text{H}_{12}$ , red squares are  $\text{CH}_2\text{O}$ , blue triangles are  $\text{CO}$ . The solid lines are the v.0 model presented in this work and the dashed lines are the optimized v.1 model with improved rate rules. The dotted lines are the model of Marrodán *et al.*<sup>3</sup>. The dash-dot lines are the model of Bugler *et al.*<sup>1</sup>.

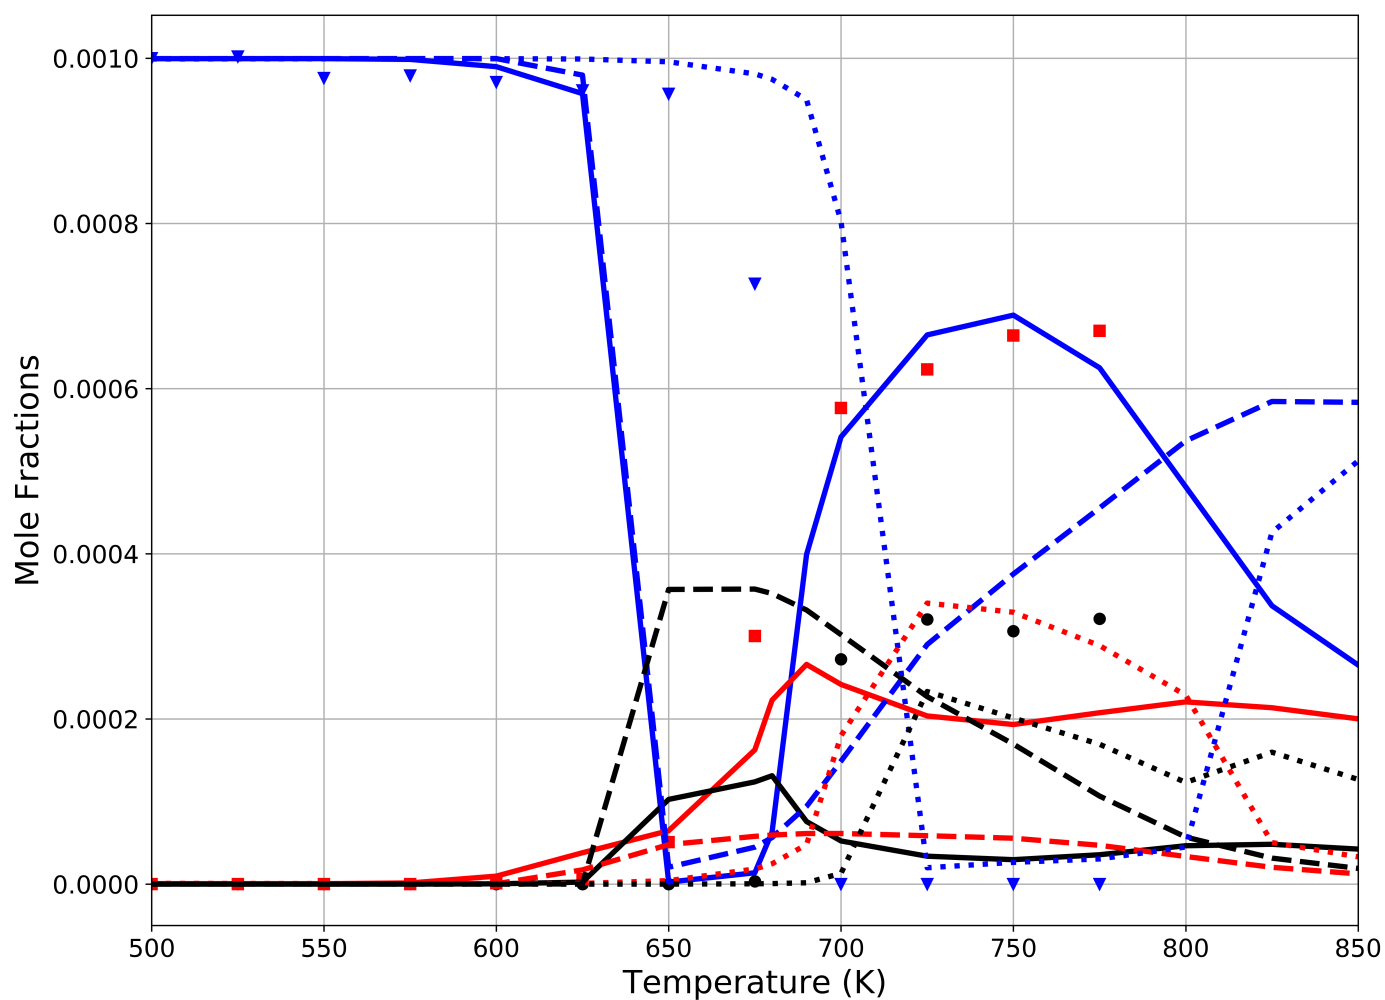

**Fig. S12** Comparison of mechanisms for pentane oxidation with 1000 ppm NO in JSR: Experimental measurements: black circles are HONO, red squares are NO<sub>2</sub>, blue triangles are NO. The solid lines are the v.0 model presented in this work and the dashed lines are the optimized v.1 model with improved rate rules. The dotted lines are the model of Marrodán *et al.*<sup>3</sup>.

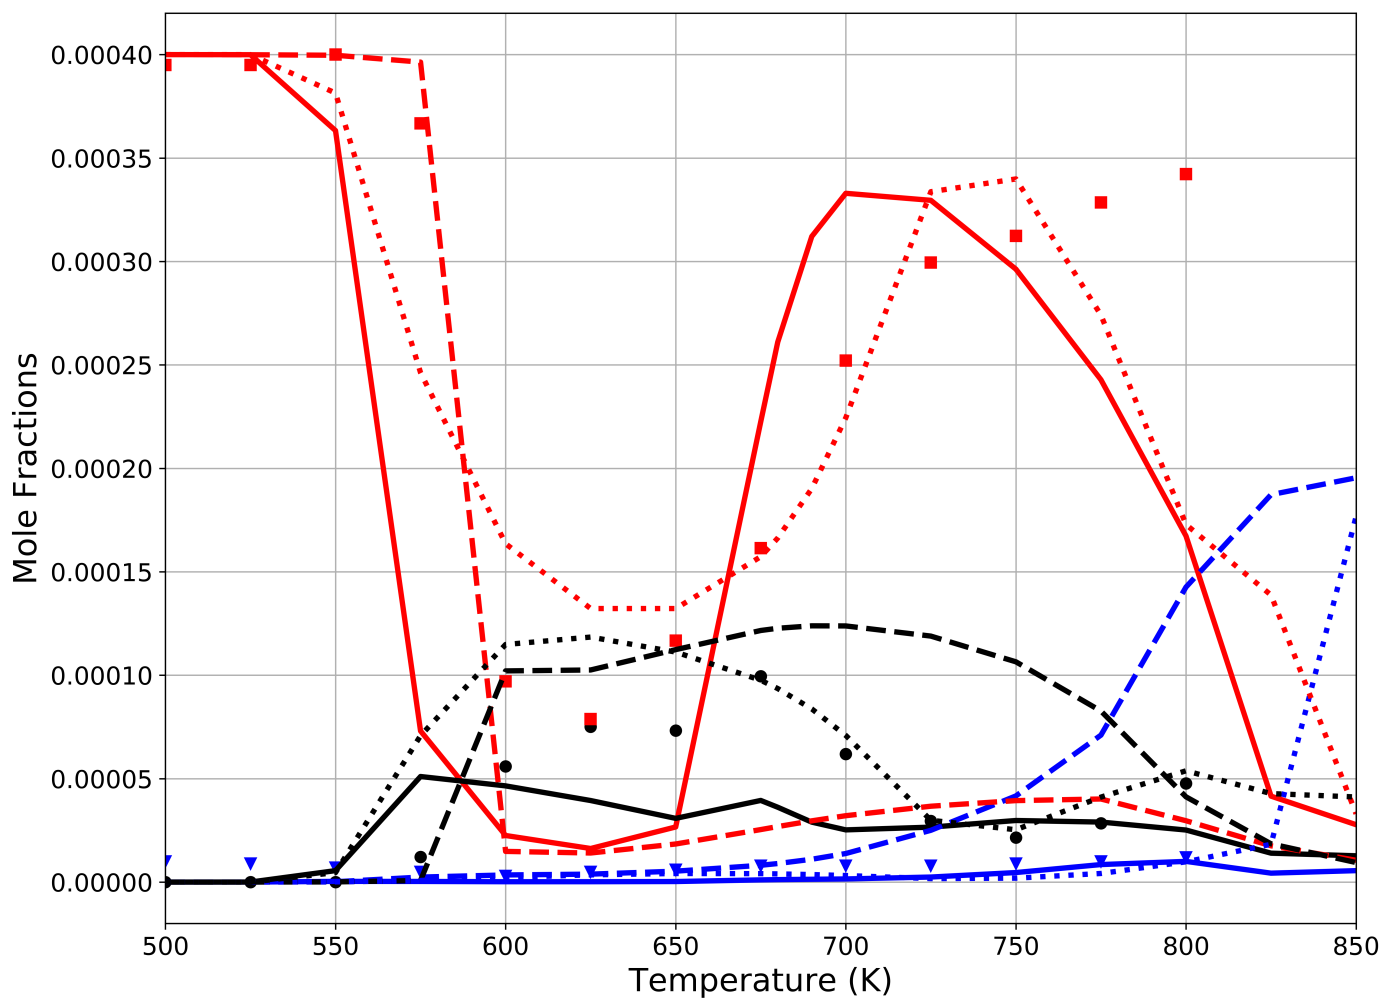

**Fig. S13** Comparison of mechanisms for pentane oxidation with 400 ppm NO<sub>2</sub> in JSR: Experimental measurements: black circles are HONO, red squares are NO<sub>2</sub>, blue triangles are NO. The solid lines are the v.0 model presented in this work and the dashed lines are the optimized v.1 model with improved rate rules. The dotted lines are the model of Marrodán *et al.*<sup>3</sup>.

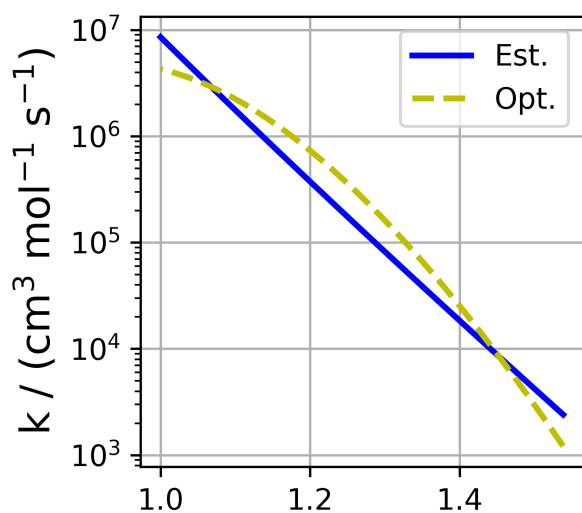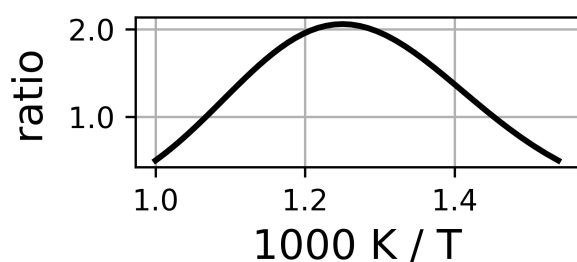

(a)  $n\text{-C}_4\text{H}_{10} + \text{NO}_2 \rightleftharpoons 1\text{-C}_4\text{H}_9 + \text{HONO}$

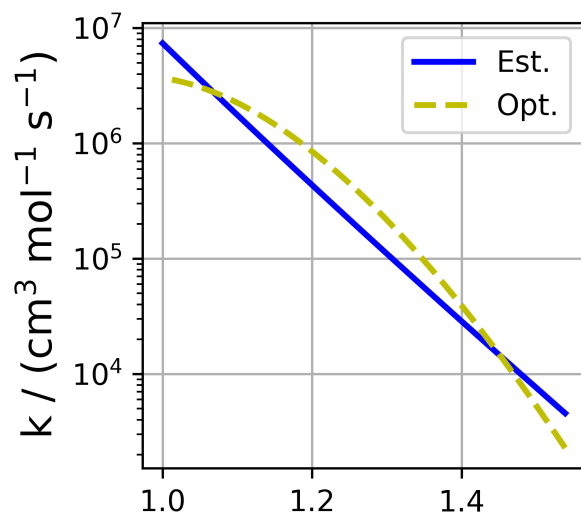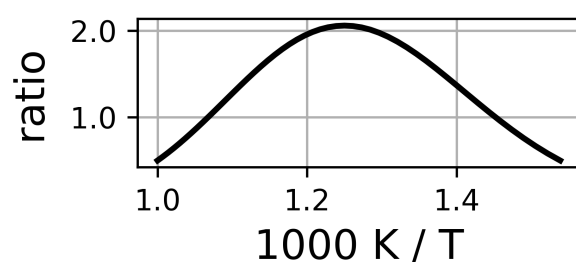

(b)  $n\text{-C}_4\text{H}_{10} + \text{NO}_2 \rightleftharpoons 2\text{-C}_4\text{H}_9 + \text{HONO}$

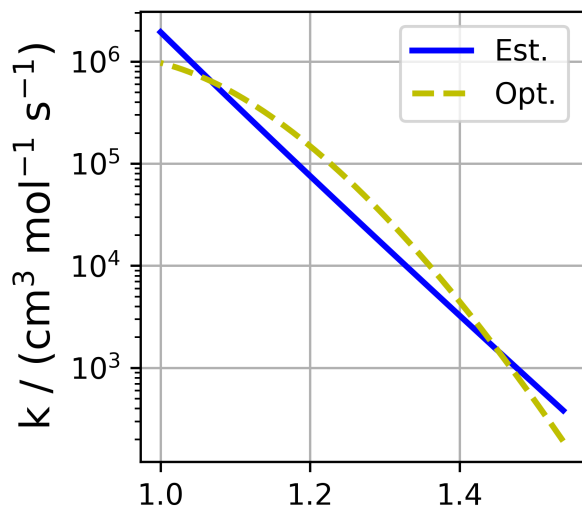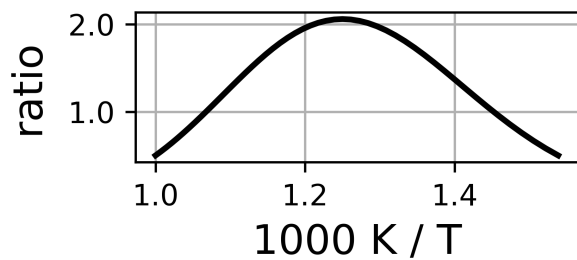

(c)  $n\text{-C}_4\text{H}_{10} + \text{NO}_2 \rightleftharpoons 1\text{-C}_4\text{H}_9 + \text{HNO}_2$

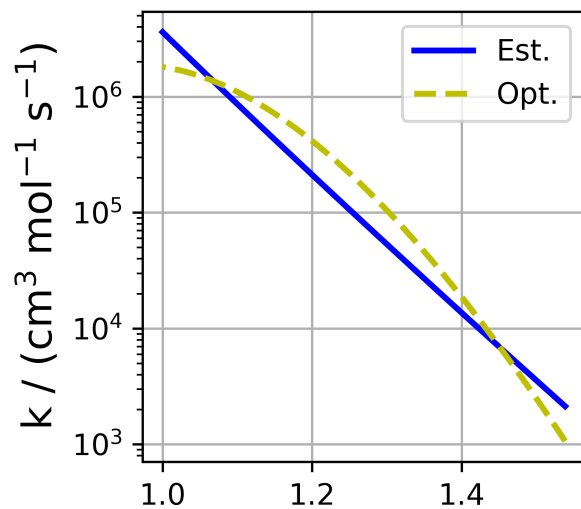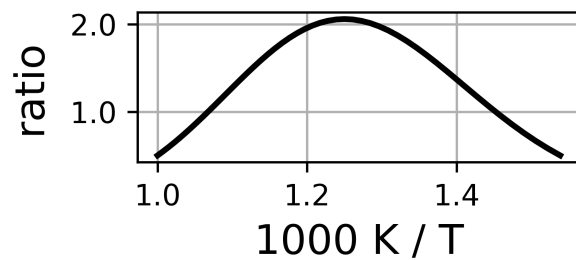

(d)  $n\text{-C}_4\text{H}_{10} + \text{NO}_2 \rightleftharpoons 2\text{-C}_4\text{H}_9 + \text{HNO}_2$

**Fig. S14** Comparison of estimated and optimized rates for hydrogen abstraction reactions of the form  $\text{RH} + \text{NO}_2 \rightleftharpoons \text{R} + (\text{HONO or HNO}_2)$  for  $\text{RH} = n\text{-C}_4\text{H}_{10}$ .



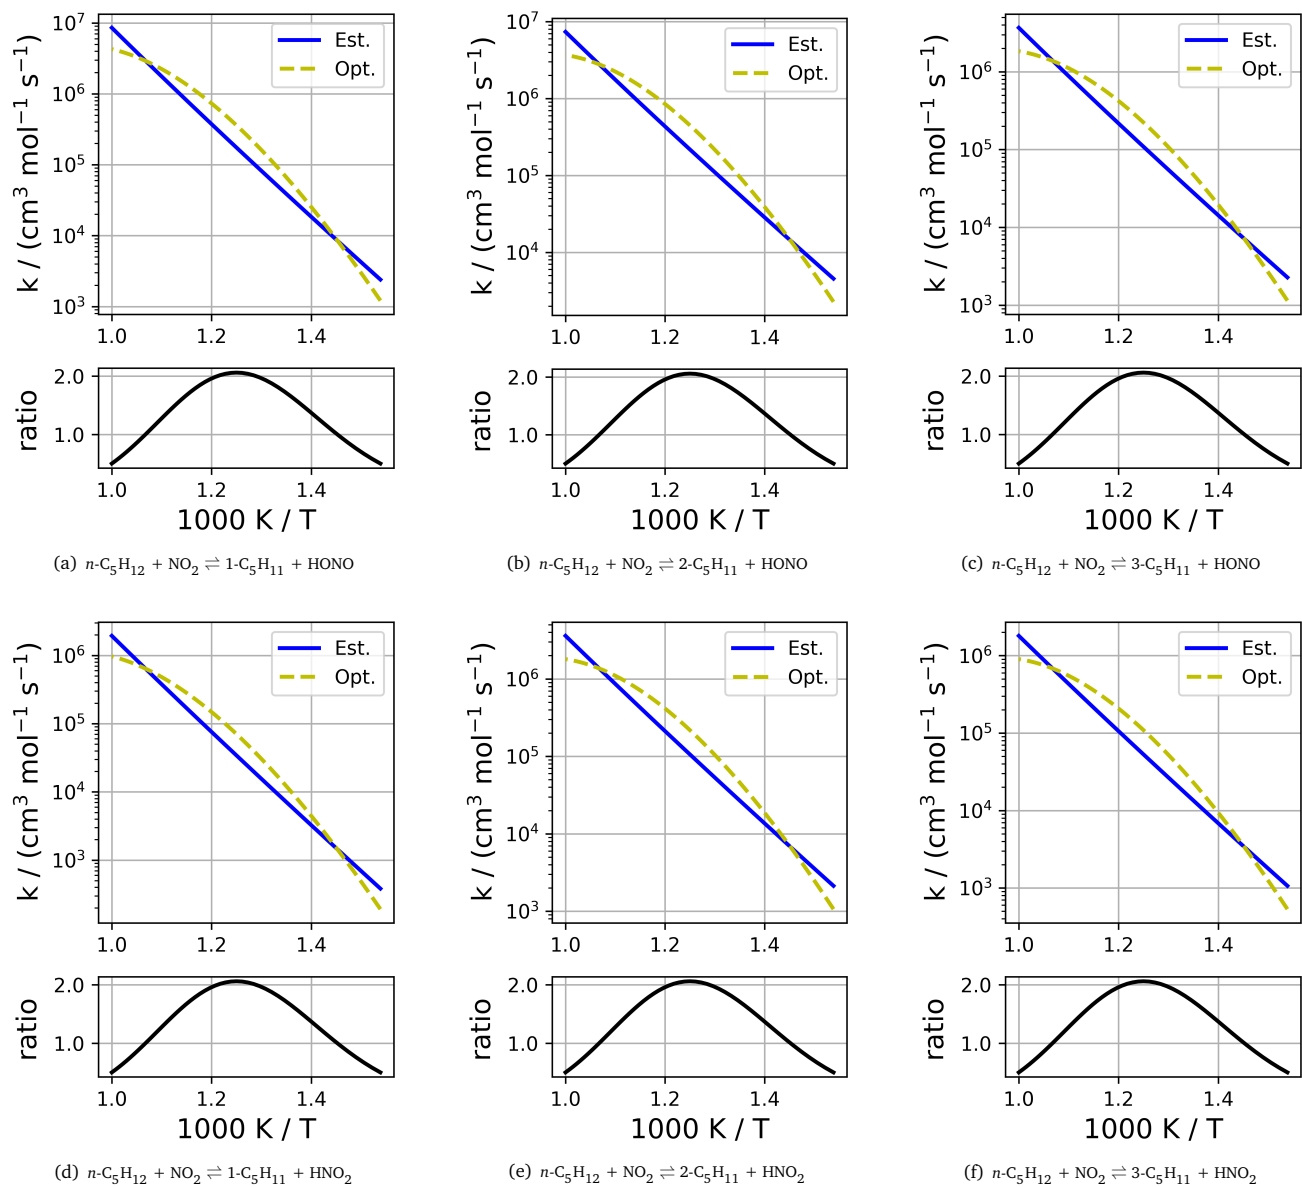

**Fig. S15** Comparison of estimated and optimized rates for hydrogen abstraction reactions of the form  $\text{RH} + \text{NO}_2 \rightleftharpoons \text{R} + (\text{HONO or HNO}_2)$  for  $\text{RH} = n\text{-C}_5\text{H}_{12}$ .

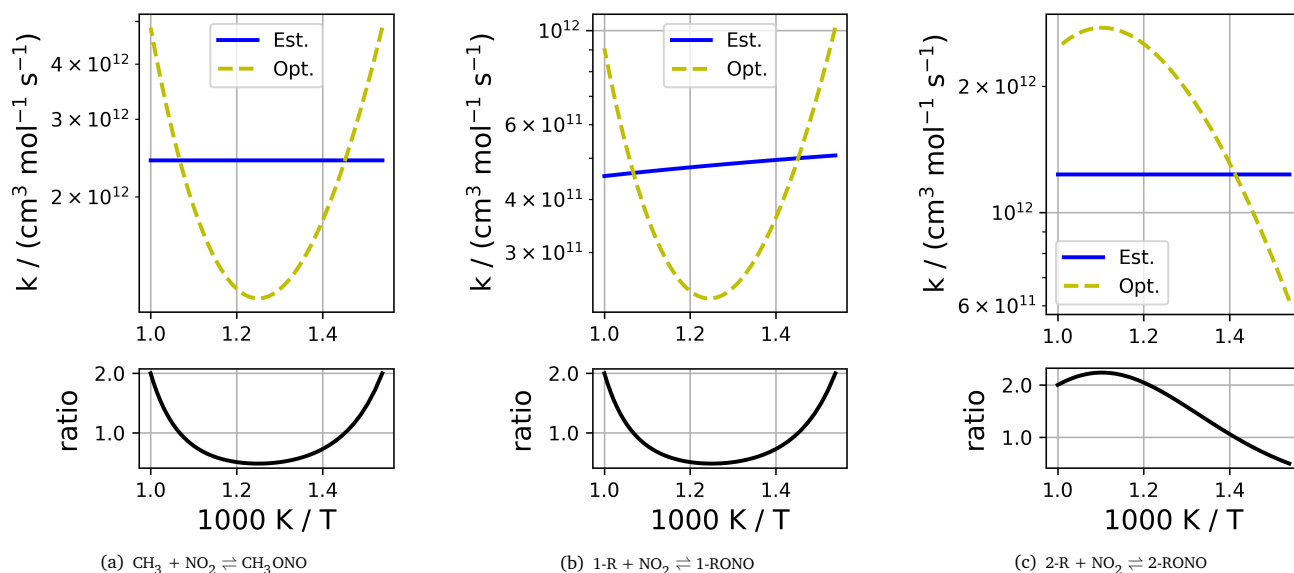

**Fig. S16** Comparison of estimated and optimized rates for reactions of the form  $\text{R} + \text{NO}_2 \rightleftharpoons \text{RONO}$ .

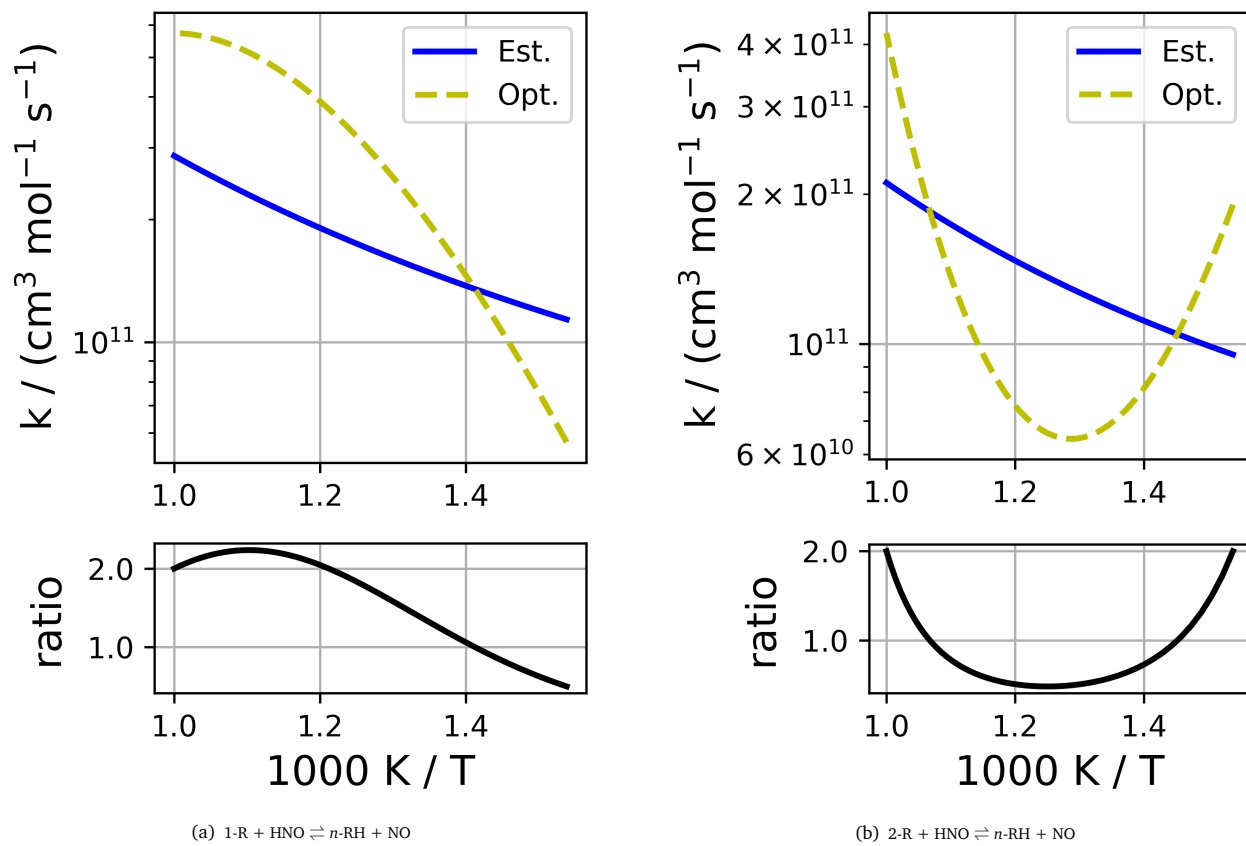

**Fig. S17** Comparison of estimated and optimized rates for hydrogen abstraction reactions of the form  $\text{RH} + \text{NO} \rightleftharpoons \text{R} + \text{HNO}$ .

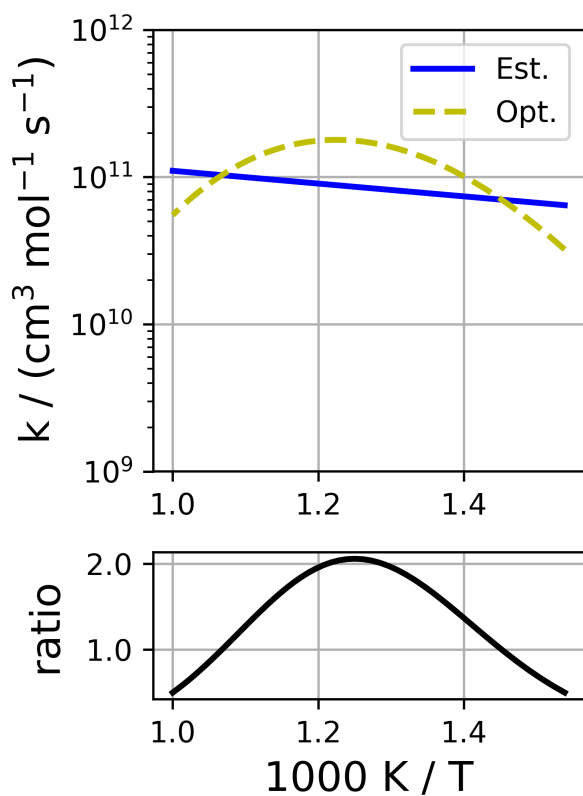

(a)  $\text{HNO} + \text{NO}_2 \rightleftharpoons \text{HNO}_2 + \text{NO}$

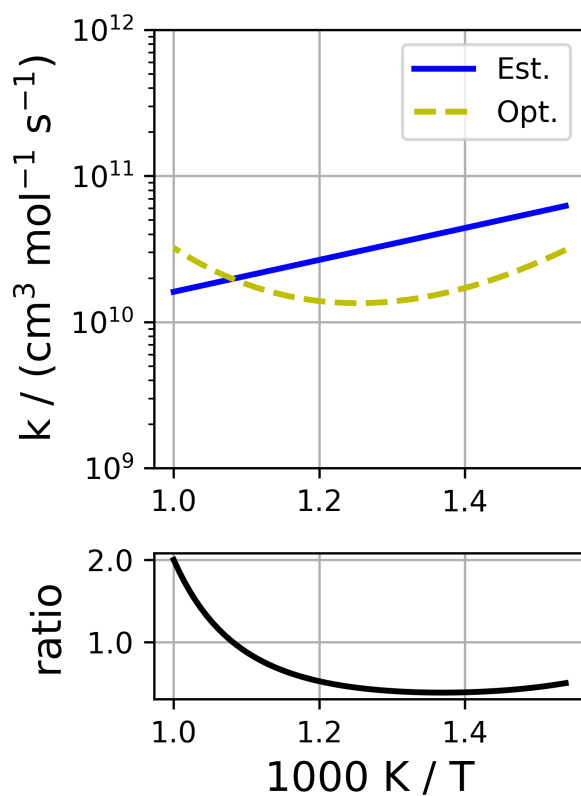

(b)  $\text{C}_2\text{H}_5\text{O}_2 + \text{NO} \rightleftharpoons \text{C}_2\text{H}_5\text{O} + \text{NO}_2$

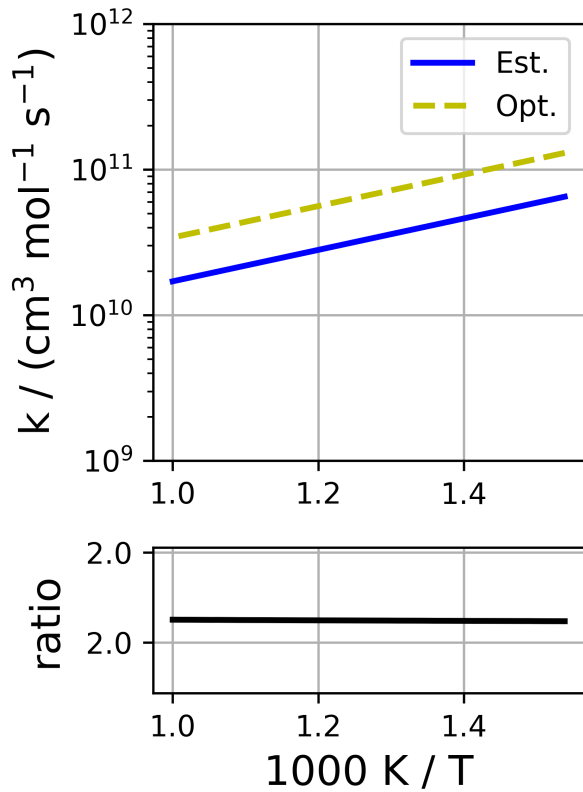

(c)  $1\text{-RO}_2 + \text{NO} \rightleftharpoons 1\text{-RO} + \text{NO}_2$

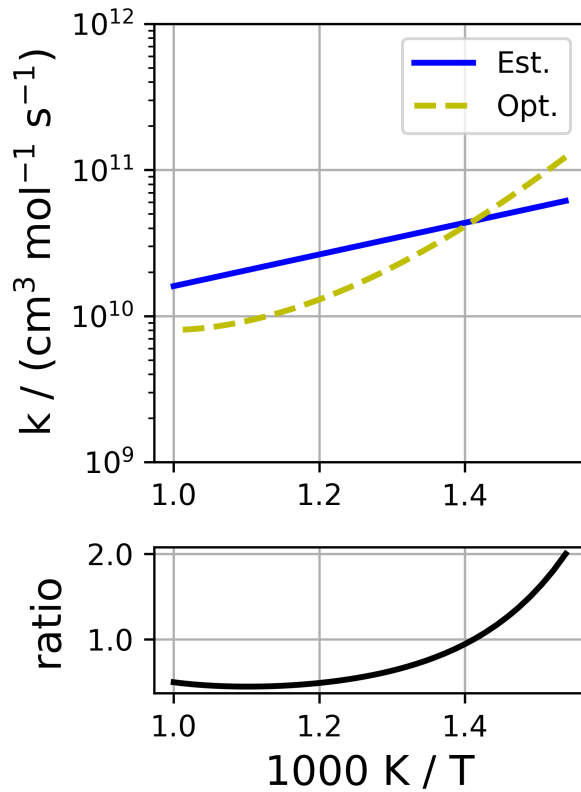

(d)  $2\text{-RO}_2 + \text{NO} \rightleftharpoons 2\text{-RO} + \text{NO}_2$

**Fig. S18** Comparison of estimated and optimized rates for  $\text{NO}_x$ -cycling reactions of the form  $\text{RO}_2 + \text{NO} \rightleftharpoons \text{RO} + \text{NO}_2$ .

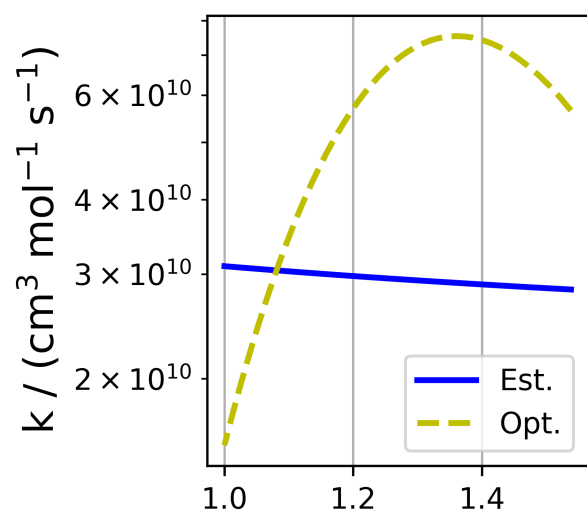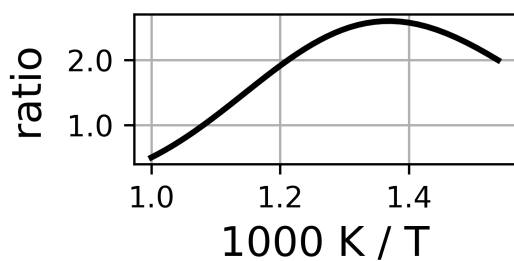

(a)  $\text{RO}_2 + \text{NO} \rightleftharpoons \text{ROONO}$

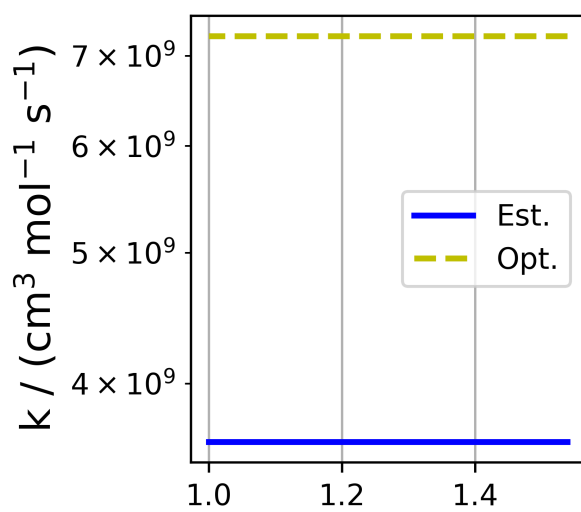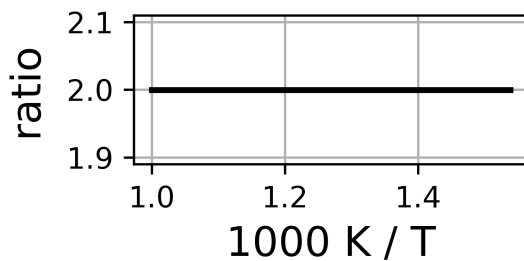

(b)  $\text{RO} + \text{NO}_2 \rightleftharpoons \text{ROONO}$

**Fig. S19** Comparison of estimated and optimized rates for unimolecular product formation in competition with  $\text{NO}_x$ -cycling.
